# Supplementary material
Source: PubMed Central journal article supplement (PMC4506213)

Figure 1a. Immunoblot scans

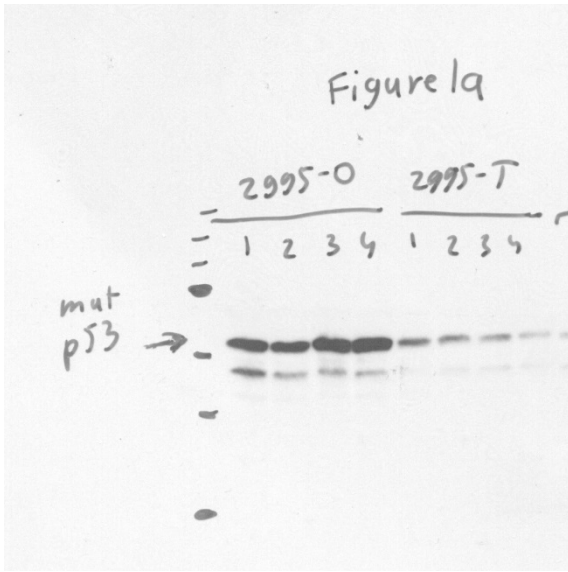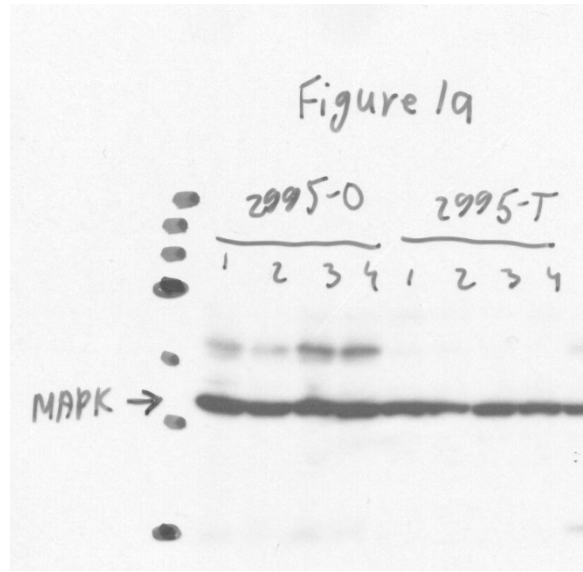

Figure 3a. Immunoblot scans

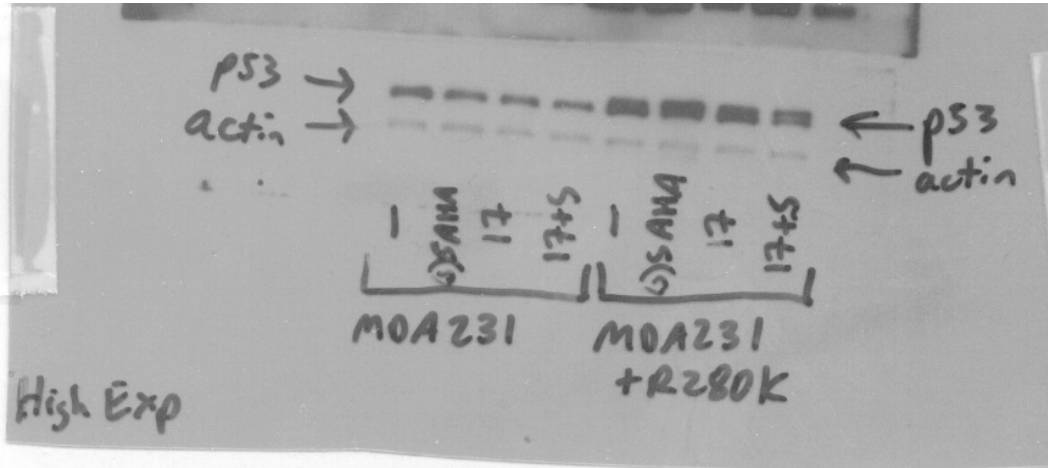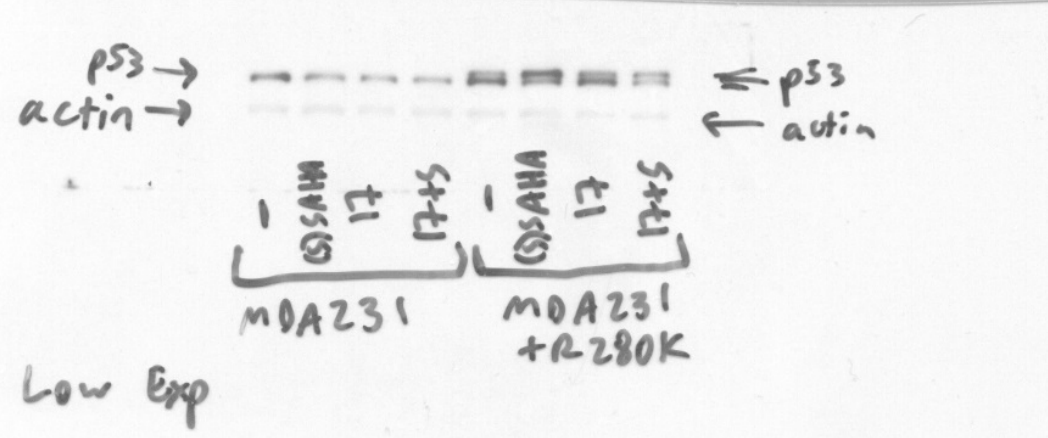

# Figure 3f. Immunoblot scans

17+SAHA #1

Vehicle #1-5 and 17+SAHA #2-6

Vehicle #6-13 and 17+SAHA #12-14

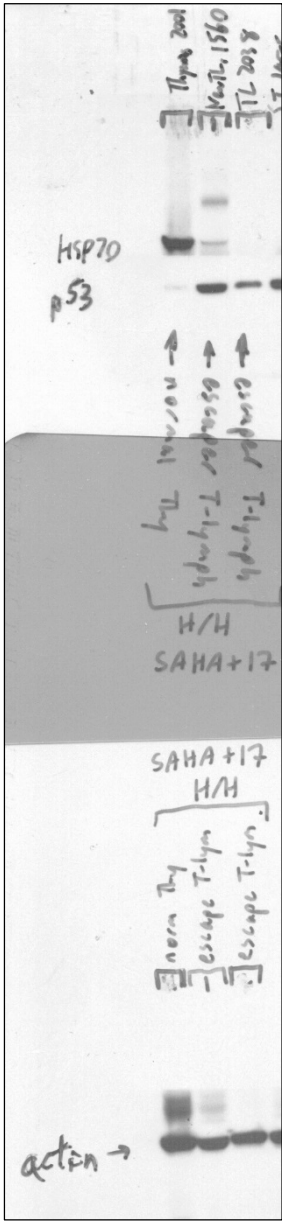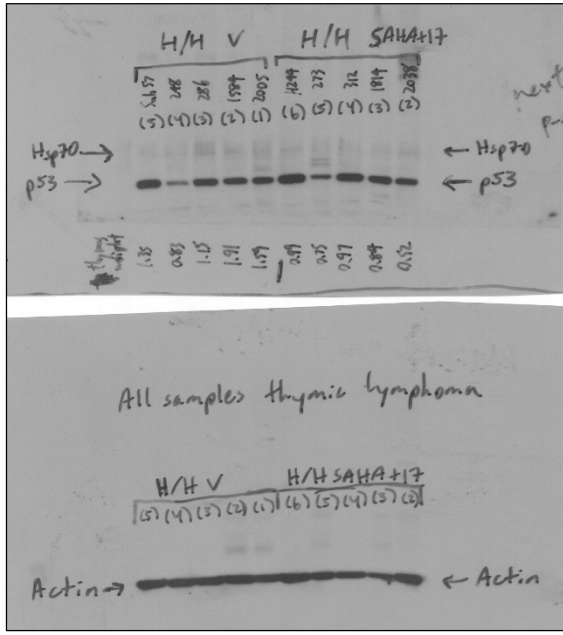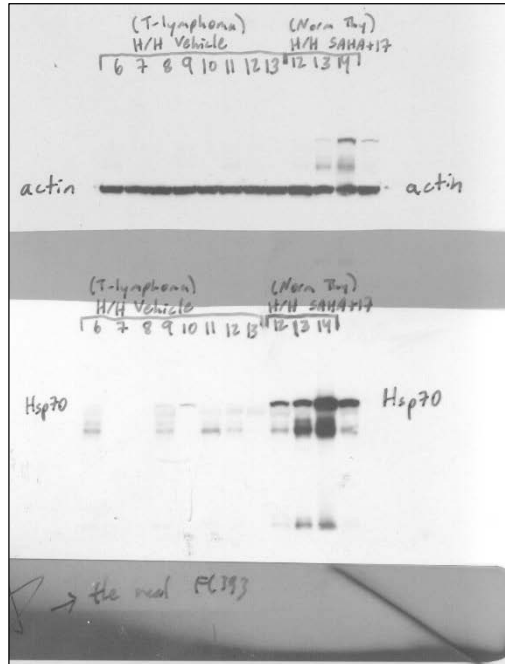

Vehicle #14-18 and 17+SAHA #7-11

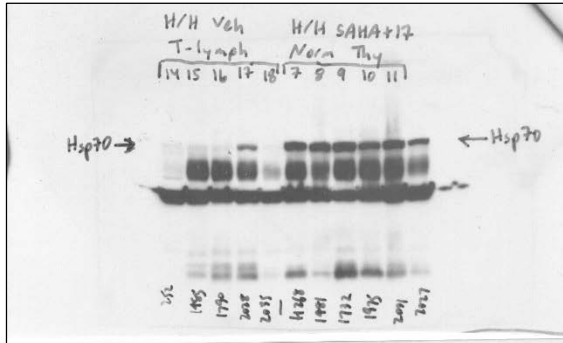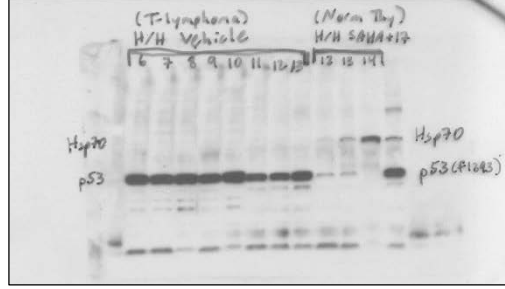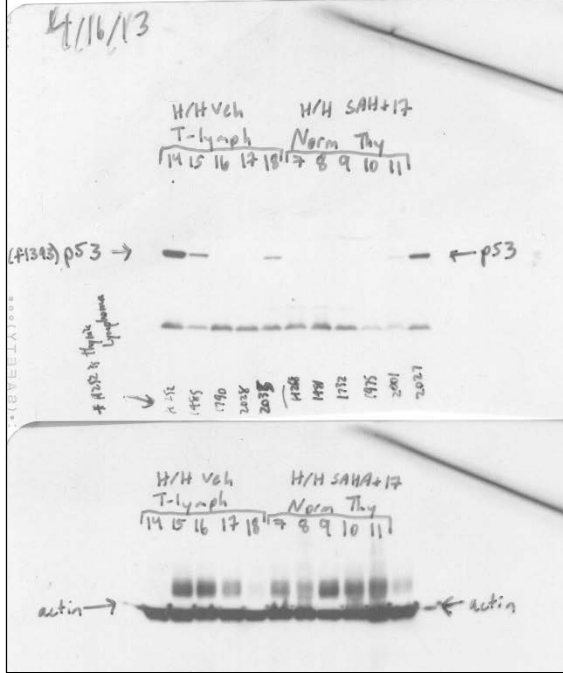

17+SAHA p53 -/- T-lymphoma

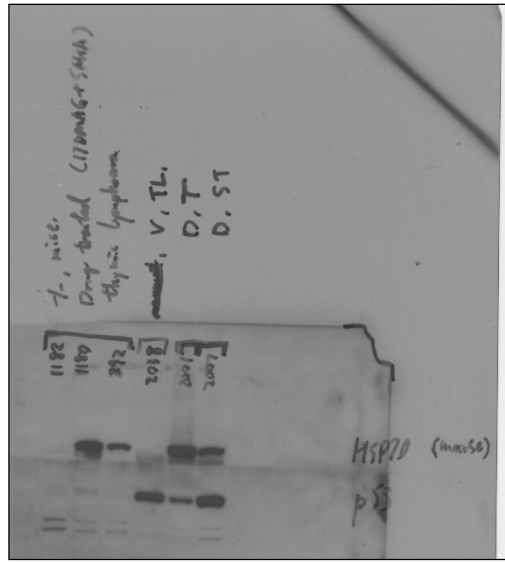

# Figure 4c. Immunoblot scans

Time-course of mutp53 levels

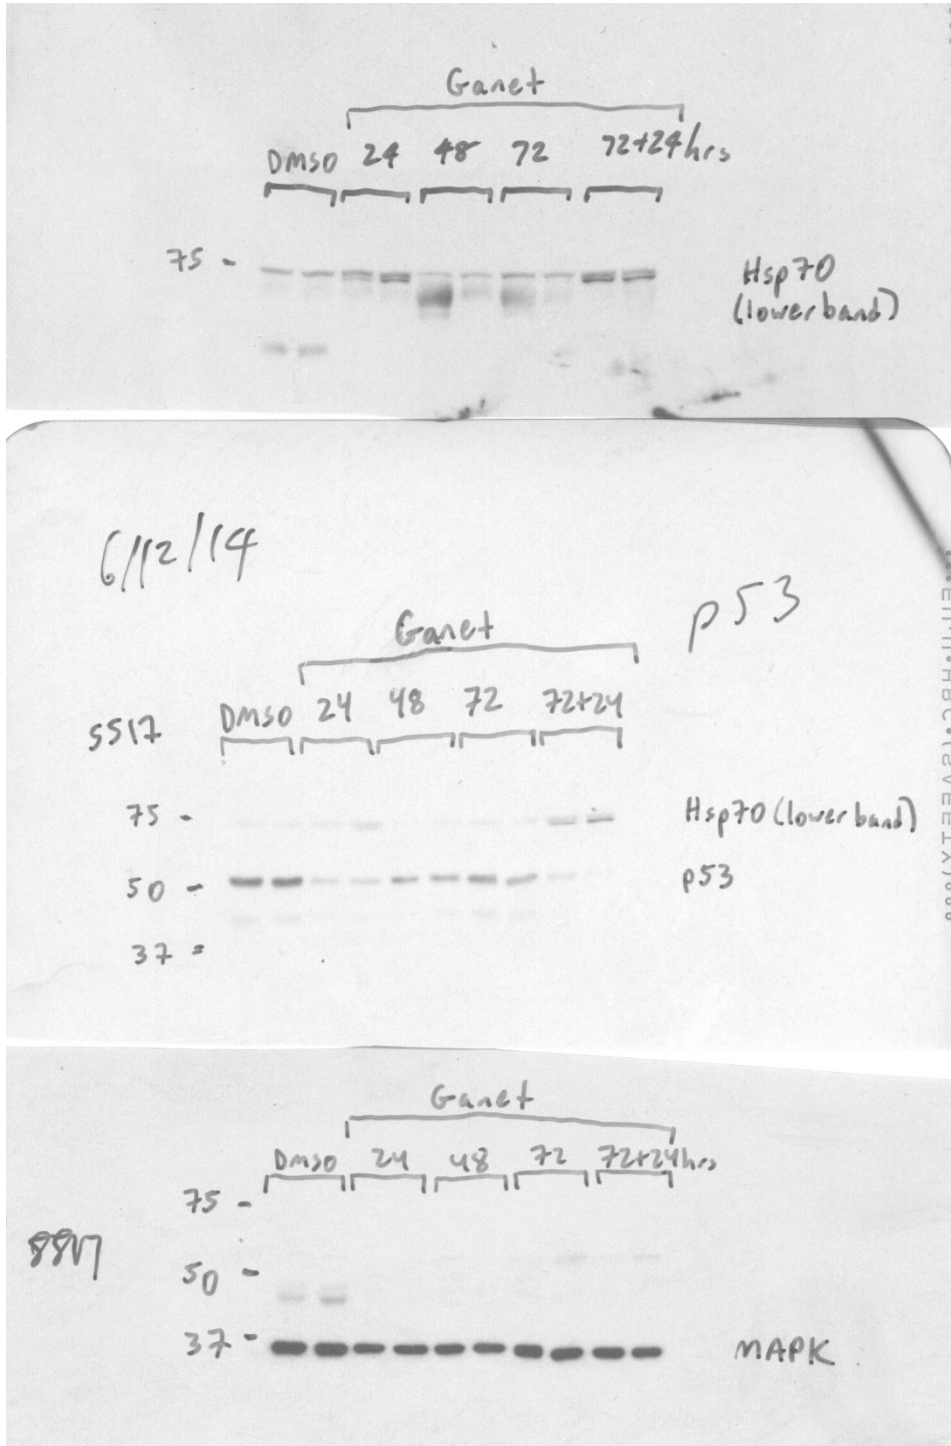

# Figure 4k. Immunoblot scans

## Littermate Analyses

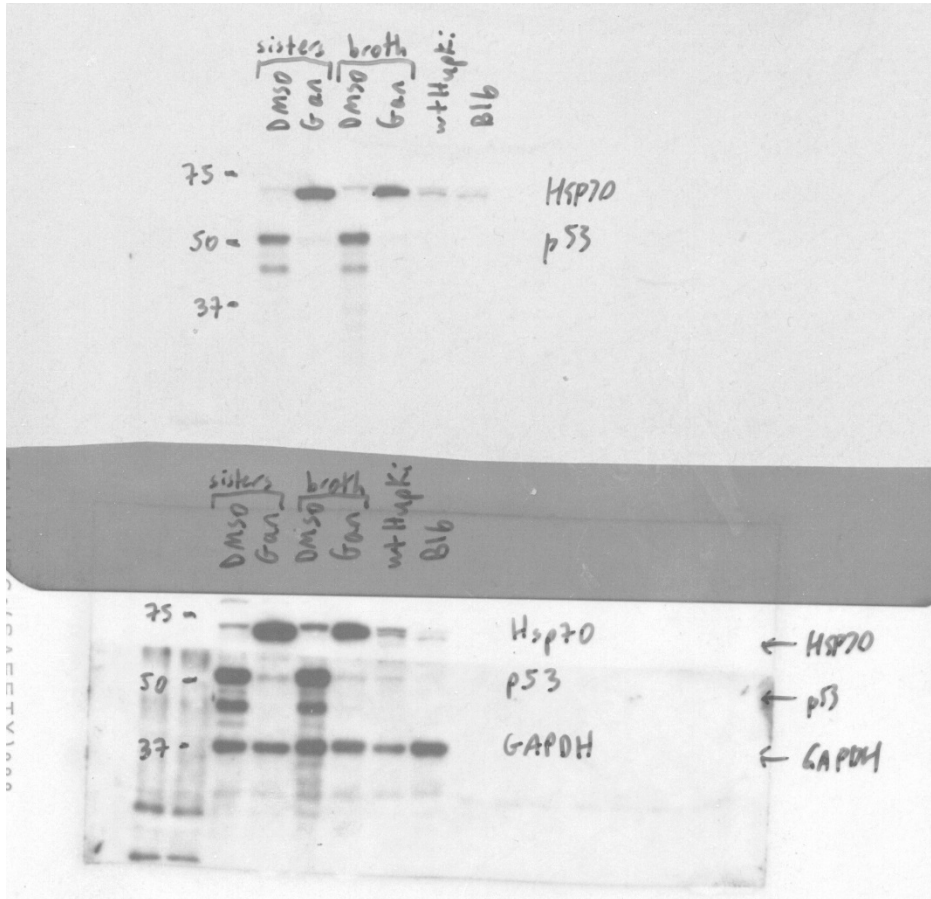

Figure 4l. Immunoblot scans

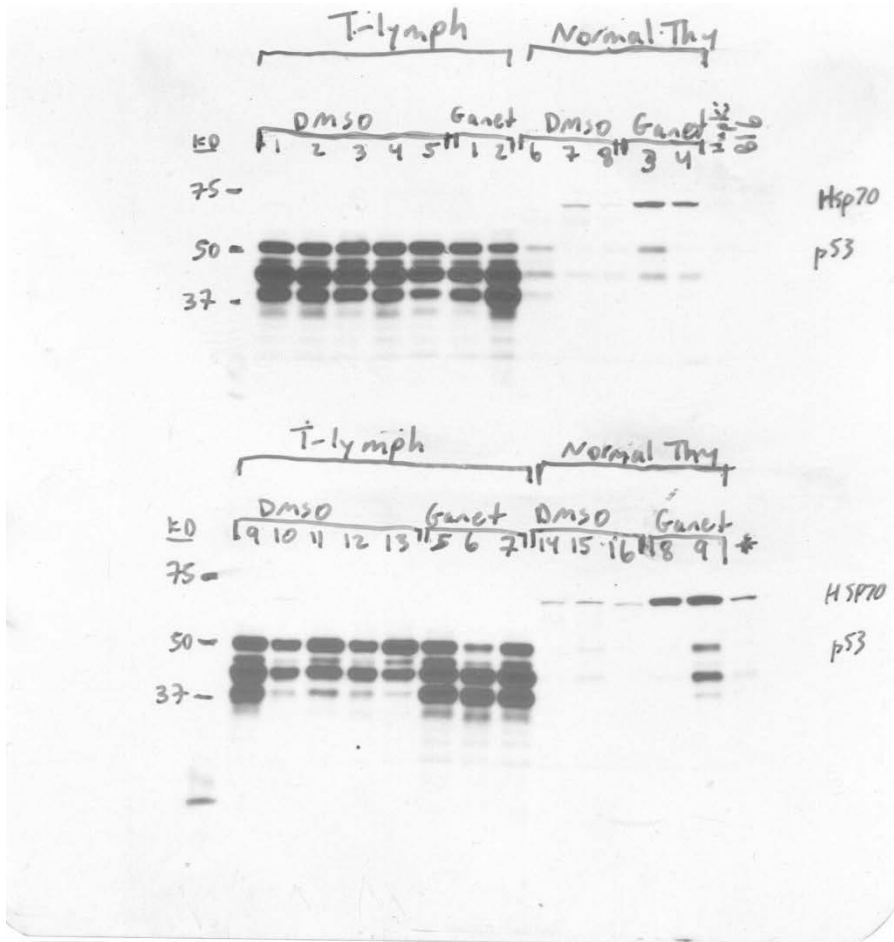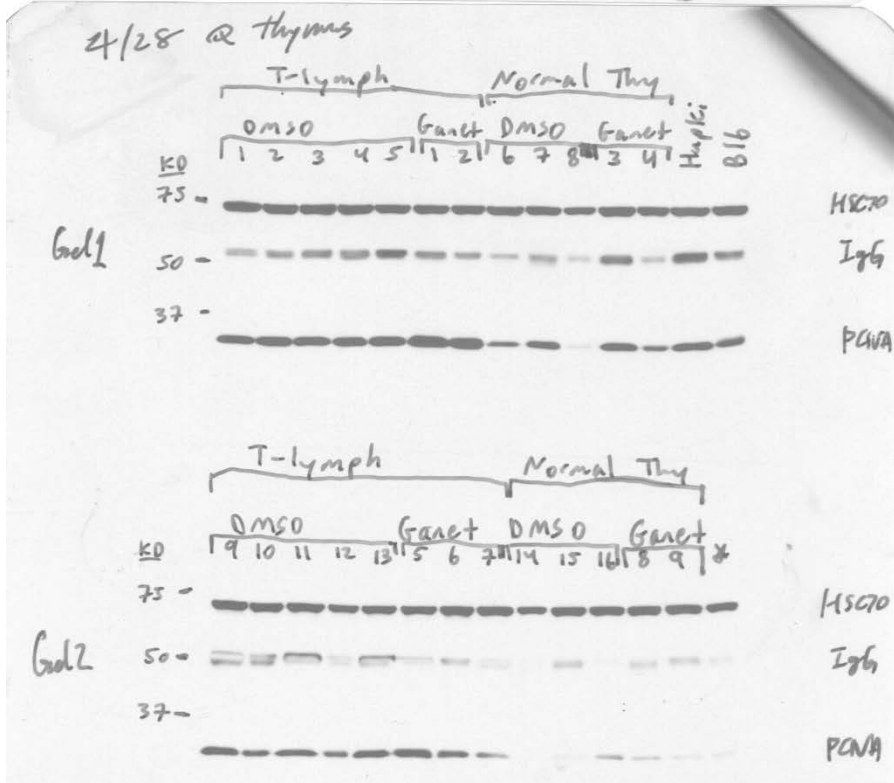

Supplement: NIHMS674510-supplement-1.pdf [file NIHMS674510-supplement-1.pdf]
